# Supplementary material
Source: PubMed Central journal article supplement (PMC8379939)
Supplement: pnas.2108963118.sapp.pdf [file pnas.2108963118.sapp.pdf]

## Supplementary Information for

“A broadly active fucosyltransferase *LmjFUT1* whose mitochondrial localization and activity is essential in parasitic *Leishmania*”

Hongjie Guo<sup>1</sup>, Sebastian Damerow<sup>1</sup>, Luciana Penha<sup>1</sup>, Stefanie Menzies<sup>1</sup>, Gloria Polanco, Hicham Zegzouti, Michael A. J. Ferguson, and Stephen M. Beverley

Corresponding author: Stephen M. Beverley; [stephen.beverley@wustl.edu](mailto:stephen.beverley@wustl.edu)

### **This PDF file includes**

Supplementary Results

Supplementary Detailed Materials and Methods

SI References

Figures S1 to S6

Tables S1 to S2

## Supplemental results.

**Efforts to detect potential *FUT1*-dependent products in *Leishmania major*.** We surveyed unsuccessfully for *FUT1*-dependent products within the parasite mitochondrion, comparing WT and  $\Delta fut1^S$  parasites. No mitochondrial specific-labelling was observed with fluorescent lectins from *Aleuria aurantia* (AAL), *Ulex europaeus* (UEA) or Isolectin B4 (IB4) (1), or with antisera to anti-blood group antigen H type 1 (2) or anti Glc $\beta$ 1-3 Fuc $\alpha$ 1- (provided by L. Mahal and L. Zhang, New York University). For both lectins and antibodies, often labelling outside of the mitochondrion was observed, possibly arising from one of the other secretory pathway glycosyltransferases (Table 1). Bioorthogonal labelling with 6-alkynyl fucose showed no differences, although labelling was seen in a region in the vicinity of the Golgi/flagellar pocket in both. Such labelling, was absent in the  $\Delta lpg2^+$  mutant lacking the Golgi GDP-Man/L-Fuc/D-Arap transporter (3-5), suggesting that 6-alkynyl fucose had been activated to GDP-6-alkynyl-Fuc and trafficked to the secretory pathway for use by other FUTs therein (Table 1).

## Detailed Materials and Methods.

***Leishmania* culture and transfection.** *L. major* strain FV1 (LmjF or WT; WHO code MHOM/IL/80/Friedlin) was grown at 26°C in M199 medium (U.S. Biologicals) containing 10% heat-inactivated fetal bovine serum and other supplements and transfected by electroporation using a high voltage protocol as described (6, 7). Following transfection, cells were allowed to grow for 16-24 h in M199 medium and then plated on semisolid media containing 1% Nobel

agar (Fisher) and appropriate selective drugs (30 µg/ml puromycin, 100 µg/ml nourseothricin, 10 µg/ml phleomycin, or 10 µg/ml G418). Individual colonies were picked and grown in liquid medium in same drug concentration as used in plates. Clones were maintained in selective medium for less than 10 passages before use, prior to which selective drug was removed for one passage. In some studies parasites were grown in Schneider's medium containing 10 % heat-inactivated fetal bovine serum.

**Molecular constructions and primers.** Molecular constructs are described in detail in Table S1 and oligonucleotide primers are described in Table S2. Molecular constructs were confirmed by restriction mapping, sequencing, and functional testing. Molecular methods were performed as described (30).

**Homologous replacement of chromosomal FUTs, often in the presence of ectopically expressed FUTs.** For *FUT1*, pXNGPHLEO-*FUT1* (B7073) was first transfected to LmFV1 WT, yielding WT / +pXNGPHLEO-*FUT1*. The presence of plasmid was confirmed by PCR and FACS analysis for the presence of *PHLEO* and GFP markers, respectively. The targeting fragments *FUT1*::*SAT* and *FUT1*::*PAC* were liberated from pGEM-*FUT1*-*SAT* (B7081) or pGEM-*FUT1*-*PAC* (B7079) by digestion with BamHI and HindIII, and then sequentially transfected into WT/ +pXNGPHLEO-*FUT1* with nourseothricin or puromycin selection, to generate  $\Delta fut1::PAC/\Delta fut1::SAT/ +pXNGPHLEO-FUT1$  (termed  $\Delta fut1^{\square}/ +pXNGPHLEO-FUT1$ ). For plasmid shuffling experiments,  $\Delta fut1^{\square}/ +pXNG-FUT1$  was further transfected with episomal pIR1NEO (B6483) into which test *FUT1* genes had been inserted (Table S1).

A similar protocol was followed for *FUT2*, substituting pXNGPHLEO-FUT2 and targeting fragments *FUT2::HYG* and *FUT2::PAC* (Table S1, Fig. S2), to generate  $\Delta fut2::PAC / \Delta fut2::HYG / +pXNGPHLEO-FUT2$ , hereafter termed  $\Delta fut2^{-} / +pXNGPHLEO-FUT2$ .

Deletion of both chromosomal copies of *SCAL* was accomplished by successive introduction of targeting fragments *SCAL::HYG* and *SCAL::BSD* (Table S1; Fig. S1), yielding  $\Delta scal::HYG / \Delta scal::BSD$ , hereafter termed  $\Delta scal^{-}$ .

**Plasmid segregation or shuffling by single cell sorting.**  $\Delta fut1^{-}$  parasites bearing pXNGPHLEO-FUT1 alone (segregation) or additionally expressing test FUT1 sequences from pIR1NEO (shuffling) were subjected to flow cytometry and single cell cloning to recover GFP+ cells (bright) or GFP-negative (dim), the latter representing potential segregants or ‘shuffles’. Prior to flow cytometry, cells were incubated in M199 medium without phleomycin for 24 h, washed with phosphate-buffered saline (PBS), and filtered through CellTrics 50  $\mu$ m filters to remove particulates. Single cell sorting of GFP “bright” or “dim” cells was performed with appropriate gates (Fig. 2C illustrates typical gating settings) using a Dako MoFlo high-speed cell sorter, with single cells selected by stringent gating on forward and side scatter parameters. Single cells were placed into individual wells of 96-well plates, each containing 150  $\mu$ l M199 or Schneider medium. Plates were incubated at 26° C for at least 2 weeks and parasite growth assessed.

**Subcellular localization of FUT1.** Logarithmic phase parasites expressing FUT-HA were collected by centrifugation and resuspended in DMEM media containing Mitotracker Red CMXRos (Invitrogen; 50 nM) for 15 min. Parasites were then washed in DMEM and fixed in

4% paraformaldehyde (in PBS) for 5 min, washed in PBS, and deposited on coverslips by centrifugation. The coverslips were then incubated in blocking buffer (PBS containing 0.1% (v/v) Triton-X-100 and 5% (v/v) normal goat sera) for 30 min prior to staining with a rabbit anti-HA polyclonal antibody (Invitrogen, diluted 1:100 in blocking buffer) for 1 h. Following extensive washing in PBS, the coverslips were then stained with an Alexa 488 goat anti-rabbit antibody (Invitrogen, diluted 1:1000 in blocking buffer).

**Immunoelectron Microscopy.** Parasites were fixed in 4% paraformaldehyde/0.05% glutaraldehyde (Polysciences Inc., Warrington, PA) in 100 mM PIPES/0.5 mM MgCl<sub>2</sub>, pH 7.2 for 1 hr at 4°C. Samples were then embedded in 10% gelatin and infiltrated overnight with 2.3 M sucrose/20% polyvinyl pyrrolidone in PIPES/MgCl<sub>2</sub> at 4°C. Samples were trimmed, frozen in liquid nitrogen, and sectioned with a Leica Ultracut UCT cryo-ultramicrotome (Leica Microsystems Inc., Bannockburn, IL). 50 nm sections were blocked with 5% FBS/5% NGS and subsequently incubated with rabbit anti-HA antibody (H 6906, Sigma, St. Louis, MO) for 1 hr, followed by secondary anti-rabbit IgG antibody conjugated to 18nm colloidal gold (Jackson ImmunoResearch Laboratories, Inc., West Grove, PA) for 1 hr. Labeling experiments were conducted in parallel with controls omitting the primary antibody, which were consistently negative. Sections were washed in PIPES buffer followed by a water rinse, and stained with 0.3% uranyl acetate/2% methyl cellulose. Samples were viewed with a JEOL 1200EX transmission electron microscope (JEOL USA Inc., Peabody, MA). For quantitation, images from sections intersecting the mitochondrion, cytosol and nucleus were chosen; for each compartment, the area was measured using Image J and beads were counted. Bead counts were normalized to the relative area of each compartment measured across all sections (approximately 1:3:2 for mitochondrion: cytosol: nucleus).

**Transmission electron microscopy.** Parasites were fixed with 4% paraformaldehyde (PFA) and 2% glutaraldehyde in 0.1 M phosphate buffer (pH 7.4) for 4 h at room temperature (RT). The samples were then washed in 0.1 M phosphate buffer, postfixed in 2% OsO<sub>4</sub>, and encapsulated in agarose. This was followed by dehydration in ascending grades of ethanol, infiltration, embedding in an Epon 812-araldite plastic mixture, and polymerization at 60°C for 24 h. Ultrathin sections (50 to 70 nm) were obtained using an ultramicrotome (Leica Ultracut UCT; Leica Microsystems GmbH, Wetzlar, Germany) and picked up onto 200 mesh copper grids. The sections were double stained with uranyl acetate and lead citrate and observed under a FEI Tecnai-12 twin transmission electron microscope equipped with a SIS MegaView II CCD camera at 80 kV (FEI Company, Hillsboro, OR, USA).

**Measurement of mitochondrial membrane potential ( $\Delta\Psi_m$ ) in live *Leishmania***

**promastigotes.** Tetramethylrhodamine ethylester perchlorate (TMRE, Molecular Probes, Inc., Eugene OR, USA) was prepared at a concentration of 1 mM in DMSO and stored at -20°C. *L. major* promastigotes were washed once in PBS, resuspended at  $2 \times 10^6$  cells/ml in PBS containing 100 nM TMRE, incubated for 15 min at room temperature, and analyzed by flow cytometry on the FL2-H channel. Baseline TMRE was recorded and expressed as mean fluorescence in arbitrary units (a.u.). Subsequently, carbonyl cyanide m-chlorophenylhydrazone (CCCP, Sigma) was added to the cells (300 mM final concentration) and TMRE fluorescence was measured at various times up to 60 min.

**Protein expression and purification.** GST- and His-tagged recombinant *FUT1* constructs were transformed to BL21 (DE3) *E. coli* strain. Cells were grown at 37 °C until OD<sub>600</sub> reached about 0.5, when 50 μM isopropyl-β-D-thiogalactopyranoside (IPTG) was added, and cultures were

further incubated at 15 °C for 16 h. Cells were harvested by centrifugation and incubated 1 hr on ice in 10 mM TrisHCl, pH 7.5, 0.15 M NaCl, 1 mM DTT, 1 mg/ml lysozyme (Sigma) with EDTA-free Complete Protease Inhibitor Tablet (Roche), before disrupting by sonication. The soluble fraction was obtained by centrifugation at  $17,000 \times g$ , 4 °C for 30 min. For GST-tagged protein purification, the supernatant was incubated with Glutathione Sepharose 4B resin (GE Healthcare) for 1 h at 4 °C. The bound protein was washed with 10 bed columns of 10 mM TrisHCl, 0.15 M NaCl followed by elution using 50 mM Tris, 50 mM reduced glutathione, 0.15 M NaCl, 5 mM DTT, 0.1% Triton X-100, pH 8.5. For His-tagged PTR1-FUT1, supernatant was incubated with Ni-NTA resin (Qiagen) for 1 h at 4 °C. The bound protein was washed with 10 bed columns of 10 mM TrisHCl, pH 8.0, 0.15 M NaCl, 50 mM imidazole followed by elution using 10 mM TrisHCl, 0.15 M NaCl, 250 mM imidazole, 5 mM DTT, 1% Triton X-100. The yield of the recombinant protein was estimated by Qubit 2.0 (Invitrogen) and the degree of purification by SDS-PAGE analysis.

**Fucosyltransferase activity assays.** Enzymatic activity was determined by GDP-Glo bioluminescent GDP detection assay with GDP-Fucose (Promega Corporation, Madison, WI USA). Aliquots of 3 µg of the affinity purified recombinant proteins were incubated with 600 µM GDP-Fuc, 10 mM acceptor ( $\beta$ -D-Gal-(1→3)-D-GlcNAc; lac-N-biose or LNB), N-acetyllactosamine (LacNAc),  $\beta$ -Galactose, or Gal $\beta$ 1,3GalNAc) or 1.7 mM peptide from mHSP70 or mHSP60 (EWKYVSDAEKE or SKELESLANDS, respectively; Peptide2go, Manassas, VA) in 20 mM sodium phosphate, 25 mM KCl, 5 mM MgCl<sub>2</sub>, pH 6.0 or 40 µM acceptor (TSR or EGF repeats, provided by R. Haltiwanger, U. Ga.) in 50 mM imidazole-HCl (pH 7.0), 50 mM MnCl<sub>2</sub>, in a final volume of 25 µl for 5 min at 37 °C. Reactions were

terminated by boiling for 5 min before 25  $\mu$ l of GDP detection reagent was added and incubated at RT for 1 h. Luminescence was recorded using a Microplate Luminometer or IVIS imaging system (Perkin Elmer, IL)

For peptide mass spectrometry, a reaction mix of LmFUT1 with the mHSP70 peptide above was acidified with trifluoroacetic acid (TFA) to a final concentration of 1%. Peptides were bound to porous graphite carbon micro-tips (Glygen) (PMID 22338125) and were eluted with 60% acetonitrile in 0.1% TFA, and dried in a Speed-Vac after adding TFA to 5%. and dissolved in 2.7  $\mu$ L of 1% formic acid. Samples were analyzed by LC-MS, using an 75  $\mu$ m i.d.  $\times$  50 cm Acclaim<sup>®</sup> PepMap 100 C18 RSLC column (Thermo-Fisher Scientific) equilibrated with 1% formic acid and a gradient from 1% formic acid to acetonitrile/1% formic acid and a Q Exactiv<sup>™</sup> Quadrupole-Orbitrap<sup>™</sup> mass spectrometer. The acquisition of the Higher-energy collisional dissociation (HCD) spectra were triggered from the values corresponding to the expected charge states of the doubly and triply charged protonated molecular ions for the unmodified and fucosylated EWKYVSDAEKE peptide ( $m/z = 692.325, 461.888, 765.354$  and  $510.572$ ). The MS1 scan was acquired in the Orbitrap mass analyzer with an AGC target value of  $3e6$  over a scan range of  $m/z = 150 - 2000$  at a mass resolving power set to 70,000 (at  $m/z = 200$ ). The unprocessed LC-MS data were analyzed using SKYLINE (version 3.6.9). It should be noted that HCD can lead to significant loss of some post-translational modifications, leading to an underestimation or in some cases complete loss (8).

### **Enzymatic assay of HA-tagged FUT1 expressed in *Leishmania* and bound to anti-HA**

**beads.** Assays and resolution of products by HPTLC were performed as described (9). Briefly, *Leishmania* lysates were incubated with anti-HA-beads (Pierce) in the presence of 1  $\mu$ Ci



GDP[<sup>3</sup>H]Fuc (American Radiochemicals) and 1 mM LNB in 50 mM TrisHCl, 25 mM KCl, pH 7.2 in a final volume of 25  $\mu$ l for 2 h at 37°C. Reactions were then cooled on ice, water added to 200  $\mu$ l final volume, and desalted on a mixed-bed column made of 100  $\mu$ l each Chelex100 (Na<sup>+</sup>) over Dowex AG50 (H<sup>+</sup>) over Dowex AG3 (OH<sup>-</sup>) over QAE-Sepharose A25 (OH<sup>-</sup>). The products were freeze dried, resuspended in water and dried in a Speedvac concentrator, and dissolved in 20% 1-propanol (HiPerSolv Chromanorm, VWR). They were then separated by HPTLC using 10 cm Si-60 plates (Merck) and separated using 1-propanol : acetone : water 9:6:4 (v:v:v) as mobile phase. Plates were sprayed with En<sup>3</sup>hance® (PerkinElmer) and the materials visualized by fluorography at -80°C using Biomax XAR film (Kodak) with an intensifying screen.

**Lectins, antibodies, and 6-alkynyl labelling.** For lectin-mediated imaging, WT,  $\Delta$ *fut1<sup>s</sup>*, or  $\Delta$ *lpg2<sup>r</sup>* parasites were grown in the presence of 100  $\mu$ M to 1mM L-fucose. After 3 days, 2 x 10<sup>6</sup> parasites were washed, fixed onto glass coverslips, and incubated with 17  $\mu$ g/mL fluorescein labeled *Aleuria aurantia* lectin (AAL; Vector Laboratories FL-1319), 20  $\mu$ g/mL *Ulex Europaeus* Agglutinin I (UEAI; Vector Laboratories FL-1061), or 5 $\mu$ g/mL *Griffonia simplicifolia* IB4-Alexa 488 lectin (Thermo Fisher; kindly provided by Igor Almeida) at room temperature in the dark for one hour. For antibody-mediated imaging, fixed parasites were incubated with 5 $\mu$ g/mL Blood Group Antigen H (O) Type 1 monoclonal antibody (Invitrogen 13-9810-82), washed three times with 1x PBS and incubated with 1:100  $\alpha$ -mouse secondary antibody conjugated to Alexa 488 (Invitrogen, A11029) each for 1 hour at room temperature. All imaging was performed using a Zeiss LSM880 Confocal Laser Scanning Microscope with Airyscan. For biorthogonal labeling, parasites were inoculated into M199 medium at 1 x 10<sup>5</sup>/mL (WT or  $\Delta$ *lpg2<sup>r</sup>*) or 3.8 x 10<sup>6</sup>/ ml ( $\Delta$ *fut1<sup>s</sup>*) and grown for three days in the presence/absence of 100 $\mu$ M alkyne fucose (Invitrogen C10264), after which parasites were washed in PBS. Prior to confocal

microscopy, click labeling was done using azide-488 (Invitrogen A10266) and the Click-iT™ Cell Reaction Buffer Kit (Invitrogen C10269). For western blotting,  $1 \times 10^6$  labelled parasites were lysed 10 mM Tris pH7.5, 150 mM NaCl, 1% NP-40, and Roche cOmplete EDTA free proteinase inhibitor cocktail (11836170001). Click labeling with biotin azide (Invitrogen B10184) was performed using the Click-iT™ Protein Reaction Buffer Kit (Invitrogen C10276). Proteins were separated using a 10% SDS-PAGE gel and transferred onto a PVDF membrane which was subsequently probed with 1:5,000 fluorescent streptavidin probe (Li-Cor 925-32230). Antisera against *L. major* histone H2A was prepared as described and used as a sample loading control (10). Western blotting with anti-GlcFuc antibody (kindly provided by Lara Mahal) was performed with lysed samples from WT,  $\Delta fut1^s$ , or  $\Delta lpg2^-$  parasites grown with or without 1mM fucose as described above; a positive control of 336 ng BSA-GlcFuc was included. The membrane was incubated in using 1 $\mu$ g/mL anti-GlcFuc for 1 hour at room temperature, washed, and probed with 1:5,000 donkey anti-chicken secondary antibody for 1 hour at room temperature (Li-Cor 925-68075). All western blot imaging was performed using the Li-Cor system.

## SI References

1. G. Valbuena, J. F. Madrid, F. Hernandez, F. J. Saez, Identification of fucosylated glycoconjugates in *Xenopus laevis* testis by lectin histochemistry. *Histochemistry and cell biology* **134**, 215-225 (2010).
2. M. Choo *et al.*, Characterization of H type 1 and type 1 N-acetyllactosamine glycan epitopes on ovarian cancer specifically recognized by the anti-glycan monoclonal antibody mAb-A4. *The Journal of Biological Chemistry* **292**, 6163-6176 (2017).

3. H. Segawa, R. P. Soares, M. Kawakita, S. M. Beverley, S. J. Turco, Reconstitution of GDP-mannose transport activity with purified *Leishmania* LPG2 protein in liposomes. *The Journal of Biological Chemistry* **280**, 2028-2035 (2005).
4. K. Hong, D. Ma, S. M. Beverley, S. J. Turco, The *Leishmania* GDP-mannose transporter is an autonomous, multi-specific, hexameric complex of LPG2 subunits. *Biochemistry* **39**, 2013-2022 (2000).
5. D. Ma, D. G. Russell, S. M. Beverley, S. J. Turco, Golgi GDP-mannose uptake requires *Leishmania* LPG2. A member of a eukaryotic family of putative nucleotide-sugar transporters. *The Journal of Biological Chemistry* **272**, 3799-3805 (1997).
6. G. M. Kapler, C. M. Coburn, S. M. Beverley, Stable transfection of the human parasite *Leishmania major* delineates a 30-kilobase region sufficient for extrachromosomal replication and expression. *Molecular and Cellular Biology* **10**, 1084-1094 (1990).
7. K. A. Robinson, S. M. Beverley, Improvements in transfection efficiency and tests of RNA interference (RNAi) approaches in the protozoan parasite *Leishmania*. *Molecular and Biochemical Parasitology* **128**, 217-228 (2003).
8. L. M. Mikesch *et al.*, The utility of ETD mass spectrometry in proteomic analysis. *Biochim Biophys Acta* **1764**, 1811-1822 (2006).
9. G. Bandini *et al.*, An essential, kinetoplastid-specific GDP-Fuc:  $\beta$ -D-Gal  $\alpha$ -1,2-fucosyltransferase is located in the mitochondrion of *Trypanosoma brucei*. *bioRxiv* 10.1101/726117v1. (2021).
10. B. A. Anderson *et al.*, Kinetoplastid-specific histone variant functions are conserved in *Leishmania major*. *Molecular and Biochemical Parasitology* **191**, 53-57 (2013).

**Figure S1**

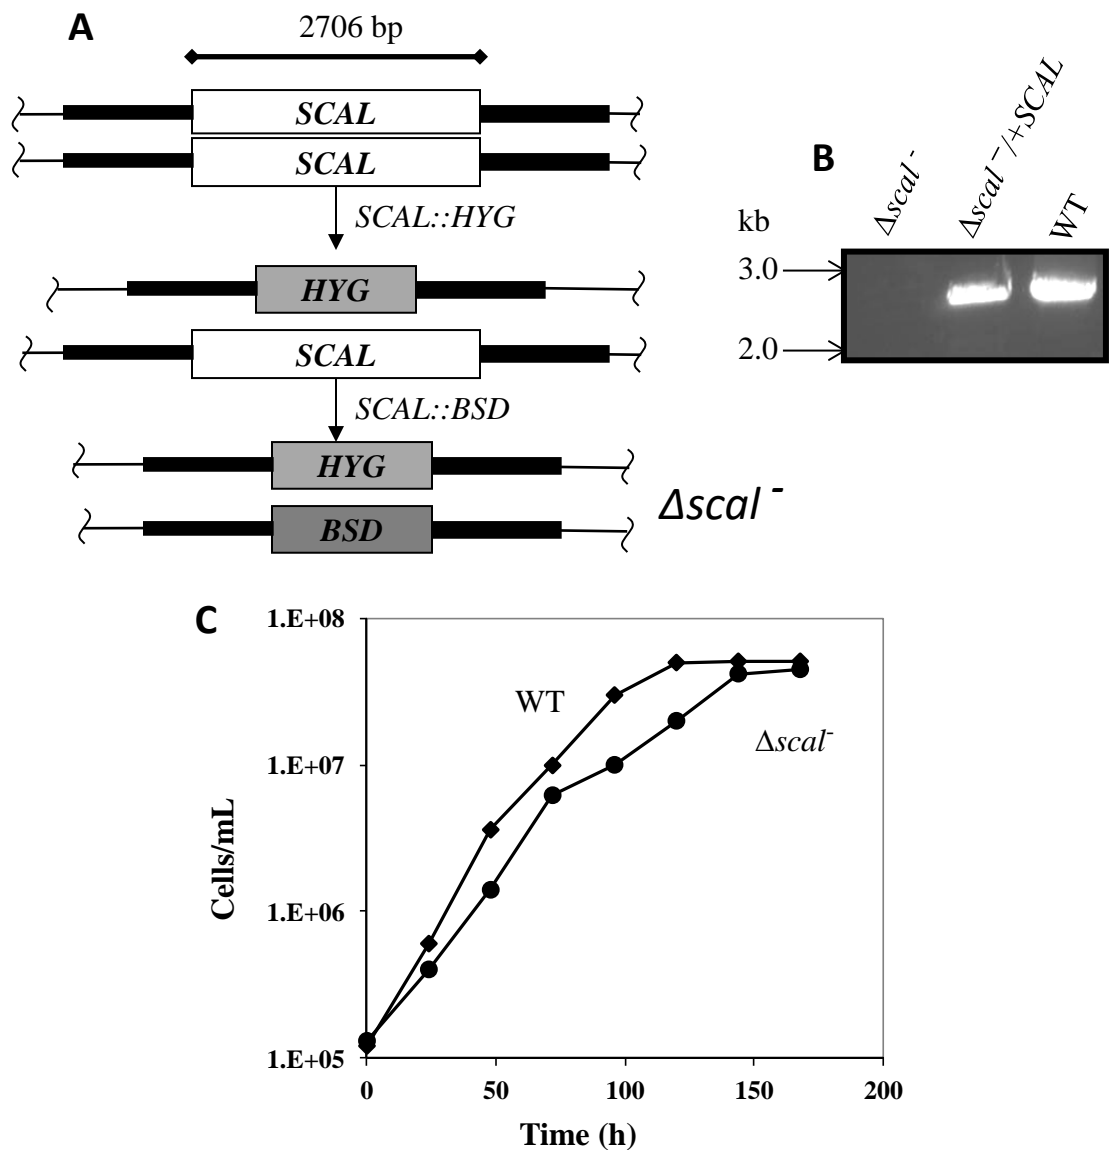

**Figure S1. The *SCAL* gene is not essential in *L. major* promastigotes**

A. Schematic of the *SCAL* locus showing flanking regions used for homologous gene replacement (dark flanking bars), the *SCAL* ORF used for PCR tests with primers 3840/3841, and the *SCAL::HYG* or *SCAL::BSD* drug resistance cassettes. WT *L. major* were successively transfected and selected for the *SCAL::HYG* and *SCAL::BSD* targeting fragments, leading to complete loss of *SCAL* ( $\Delta scal^-$ ).

B. PCR with *SCAL* ORF primers showing loss of *SCAL* in  $\Delta scal^-$  and retention in WT. and restoration in  $\Delta scal^-/+pXNGSAT-SCAL$

C. Growth of WT and  $\Delta scal^-$  in M199 medium.

## Figure S2

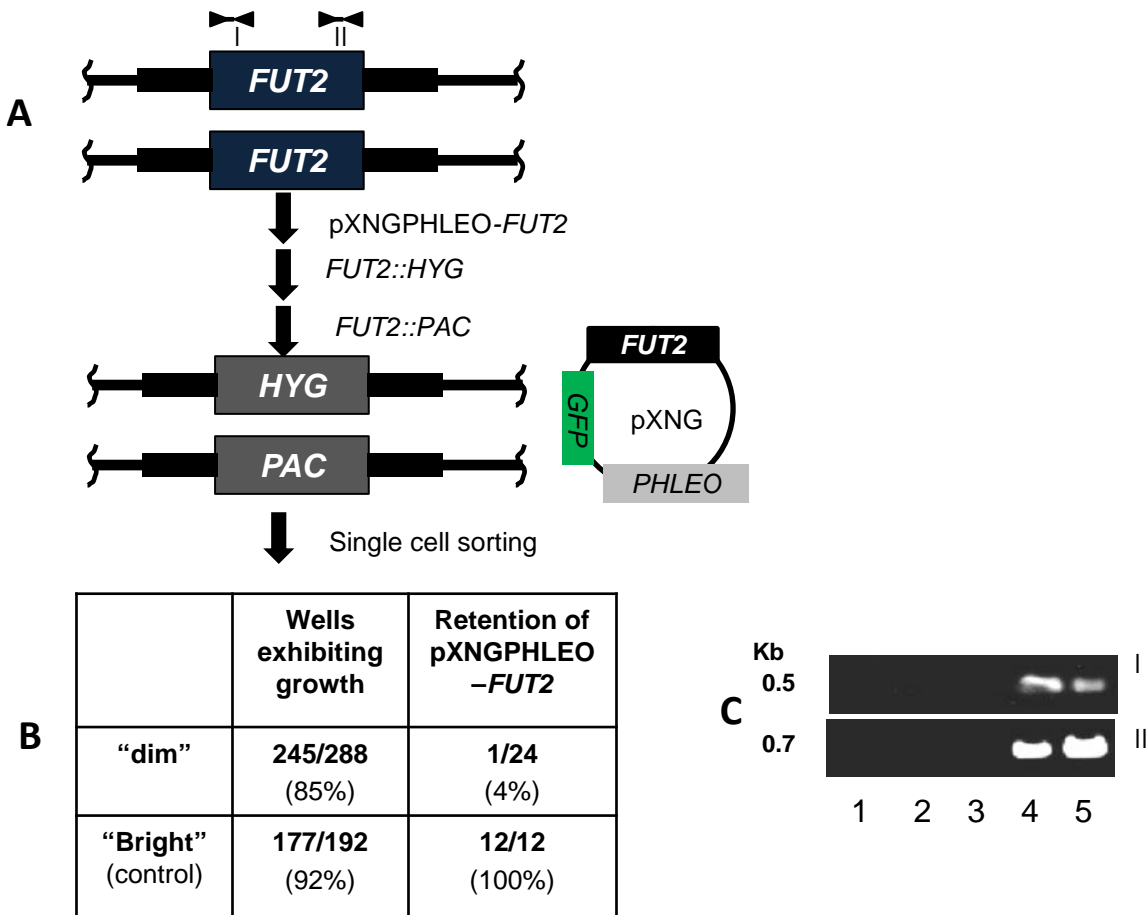

### Figure S2. The *FUT2* gene is not essential in *L. major* promastigotes.

- A. Diagram of the *FUT2* locus and PCR primers used, and the scheme for introduction of episomal *FUT2* followed deletion of both chromosomal alleles. Heavy black bars depict the flanking sequences used in targeting constructs.
- B. Results of plasmid segregation tests; survival of “dim” cells and loss of pXNGPHLEO-*FUT2* established the viability of the  $\Delta fut2^-$  cells.
- C. PCR to confirm loss of all *FUT2* sequences in  $\Delta fut2^-$ . Lanes 1-3, 3 different  $\Delta fut2^-$  clones; lane 4,  $\Delta fut2^-/+pIR1SAT-FUT2$ ; lane 5, WT. Primer pairs I (3990/3839) and II (3957/3958) probe the left and right ends of the *FUT2* ORF.

# Figure S3

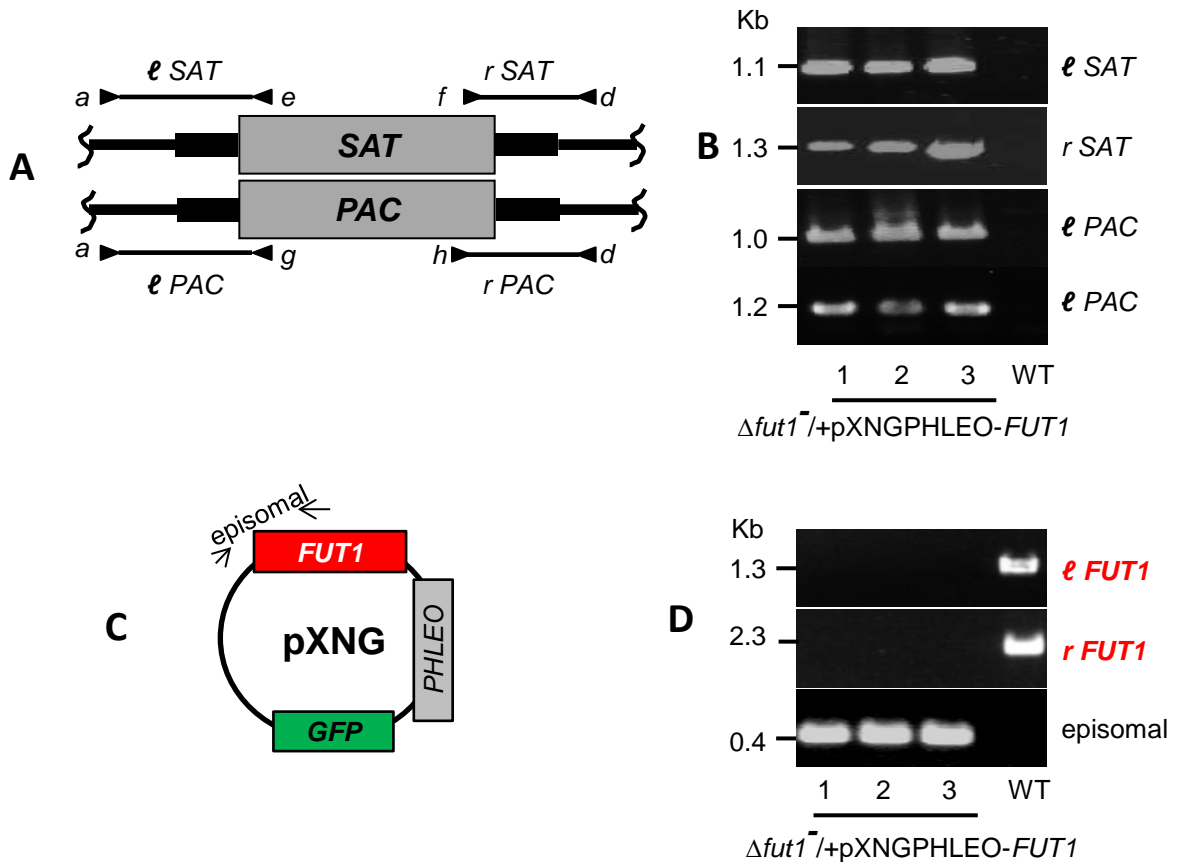

**Fig. S3 PCR verification tests of *fut1*<sup>-/+</sup>pXNGPHLEO-*FUT1***

- A. Schematic of chromosomal loci with *FUT1*:*SAT* and *FUT1*:*PAC* replacements. The location of PCR primer pairs used to establish both planned chromosomal replacements is shown. Black bars represent flanking regions used for homologous recombination.
- B. PCR tests of planned *SAT* and *PAC* replacements depicted in panel A. Lanes 1-3 contain three different  $\Delta fut1^{-}/+pXNGPHLEO-FUT1$  clones; lane 4, WT.
- C. Schematic of the pXNGPHLEO-*FUT1* episome. The location of the episomal-specific *FUT1* PCR primers is indicated.
- D. PCR tests confirming expected presence or absence of pXNGPHLEO-*FUT1*; lanes and samples are the same as in panel B.

# Figure S4

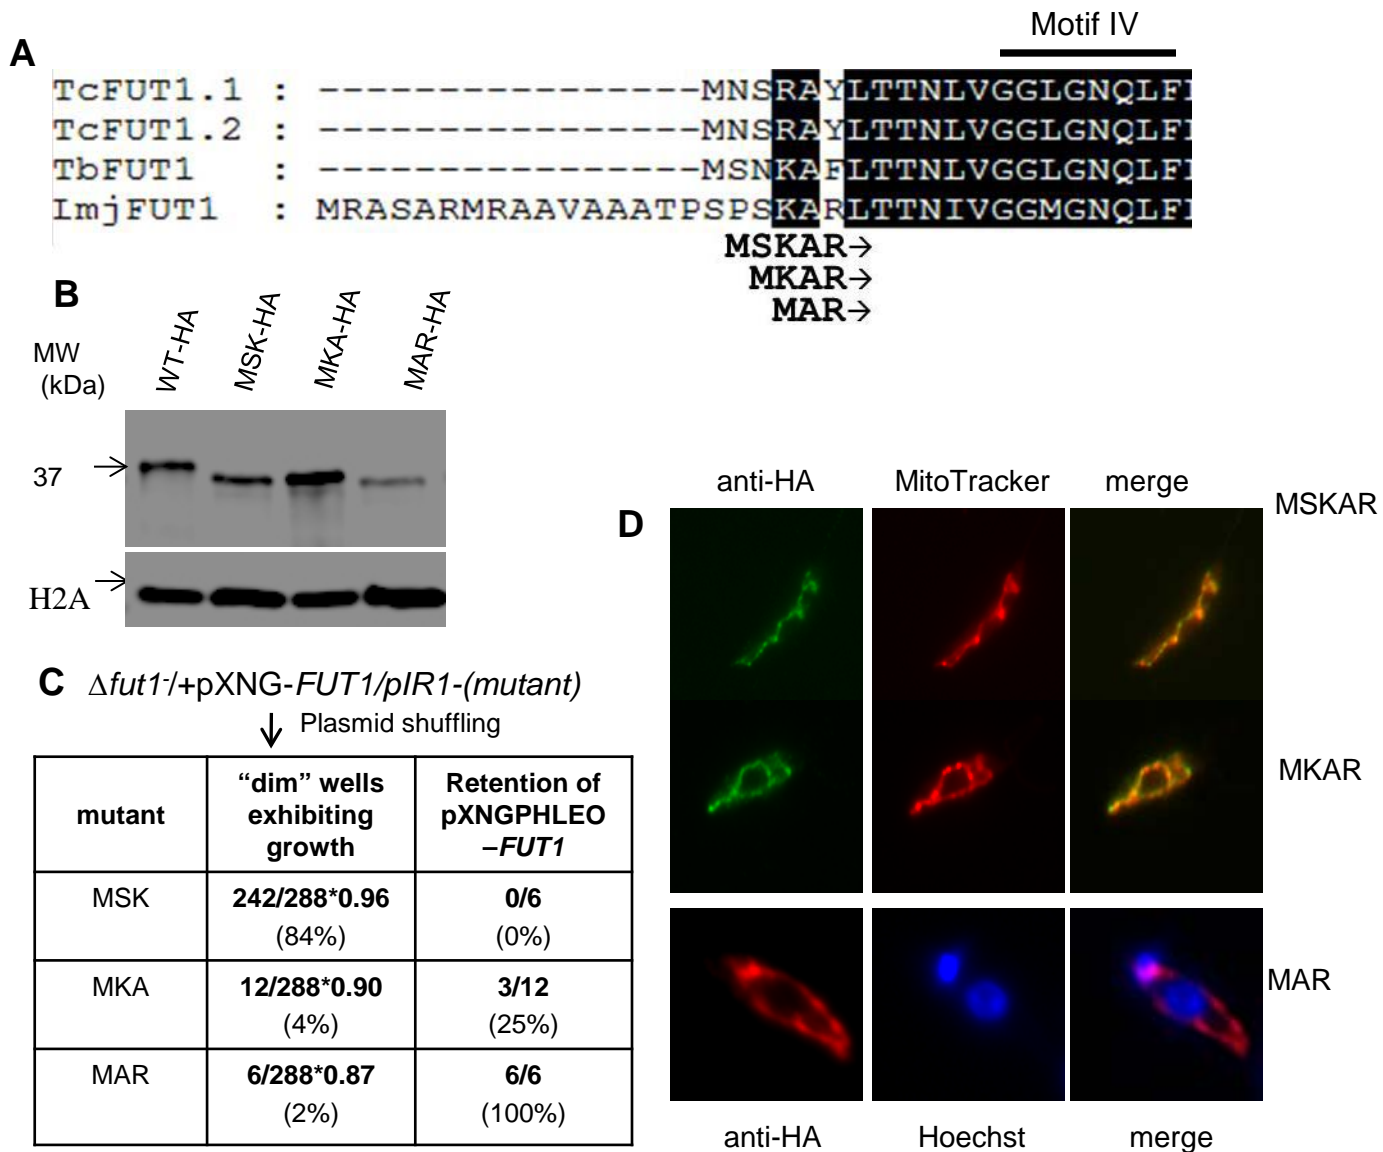

## Figure S4. Functionality and mitochondrial localization of N-terminal deletions of LmFUT1

Panel A. Alignment of N-termini of FUT1s from Trypanosomatids; beneath the LmjFUT1 the starting sequences of the three truncation mutants tested are shown.

Panel B. Western blot analysis with anti-HA antisera of whole cell lysates from tagged truncated FUT1 mutants ( $\Delta fut1/+pXNG-FUT1/pIR1-TRU-HA$ ). Lane 1: WT-HA, Lane 2: MSK-HA, Lane 3: MKA-HA, and lane 4: MAR-HA.

Panel C. Plasmid shuffling to test the function of truncated LmjFUT1s (TRUs).

Panel D. Indirect immunofluorescence of truncated LmjF mutants described in panel C incubated with anti-HA antibody (green or red, column a), Mitotracker Red CMXRos (red, column b for MSKAR and MKAR mutants), or Hoechst dye (blue, column b for MAR mutant); merged fluorescence images are shown in panel c. For MSKAR and MKAR mutants, Pearson's correlation coefficient with Mitotracker was 0.95 and 0.93.

## Figure S5. Tandem MS analysis

- A. HCD spectrum of the EWKYVS(Fuc)DAEKE peptide product formed after fucosylation by recombinant LmjFUT1 *in vitro*, acquired from the doubly charged precursor ion at  $m/z = 765.355$ . Most of the unmarked ions could be assigned to loss of water and ammonia from the parent fragment ions as listed in panel B.  $\blacklozenge$  marks fucose-containing ions.

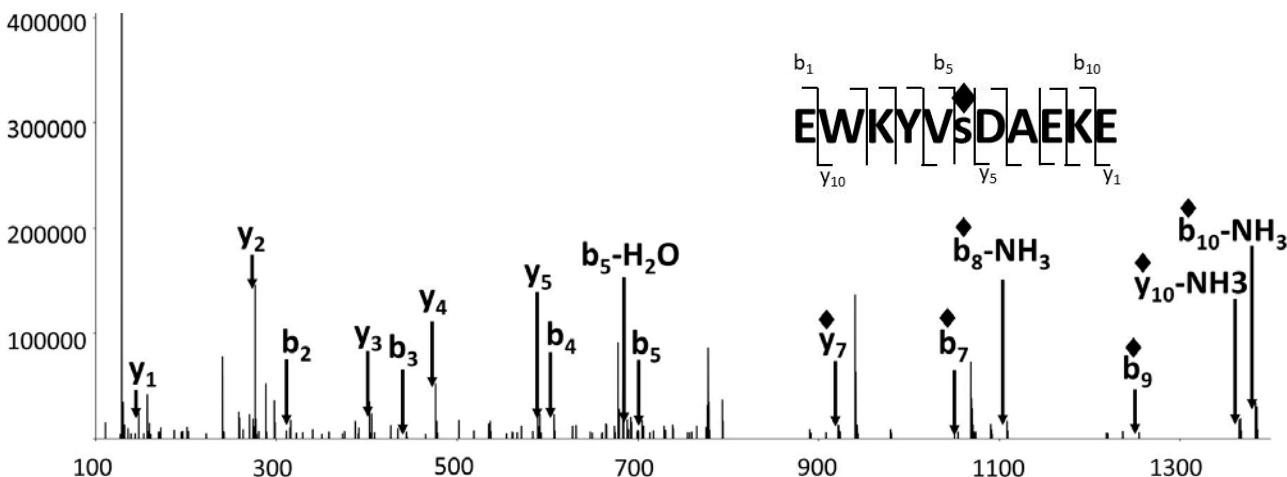

B. Assigned fragmentation ions and mass accuracy from tandem MS of the EWKYVS(Fuc)DAEKE peptide shown in panel A.

$\blacklozenge$  marks fucose-containing ions.

| ion                                 | $m/z$<br>(Theoretical) | $m/z$<br>(Observed) | ppm |
|-------------------------------------|------------------------|---------------------|-----|
| $b_4$                               | 607.288                | 607.289             | 2.6 |
| $\blacklozenge$ - $b_7$             | 1054.473               | 1054.48             | 3.0 |
| $\blacklozenge$ - $b_9$             | 1254.552               | 1254.559            | 5.2 |
| $b_2$ - $H_2O$                      | 298.119                | 298.119             | 0.7 |
| $b_3$ - $H_2O$                      | 426.214                | 426.212             | 3.3 |
| $b_4$ - $H_2O$                      | 589.277                | 589.278             | 2.0 |
| $b_5$ - $H_2O$                      | 688.345                | 688.342             | 4.8 |
| $\blacklozenge$ - $b_{10}$ - $NH_3$ | 1365.621               | 1365.627            | 4.5 |
| $y_1$                               | 148.060                | 148.061             | 1.4 |
| $y_2$                               | 276.155                | 276.156             | 0.4 |
| $y_3$                               | 405.200                | 405.199             | 2.5 |
| $y_4$                               | 476.235                | 476.235             | 1.0 |
| $y_5$                               | 591.262                | 591.264             | 3.9 |
| $\blacklozenge$ - $y_7$             | 923.420                | 923.418             | 2.5 |
| $y_1$ - $H_2O$                      | 130.050                | 130.05              | 0.8 |
| $y_2$ - $H_2O$                      | 258.145                | 258.145             | 1.9 |
| $y_3$ - $H_2O$                      | 387.187                | 387.188             | 1.8 |
| $y_2$ - $NH_3$                      | 259.129                | 259.128             | 1.2 |
| $\blacklozenge$ - $y_{10}$ - $NH_3$ | 1383.632               | 1383.637            | 4.0 |



## Figure S5. Tandem MS analysis (continued)

C. HCD spectrum of the EWKYVSDAEKE peptide, acquired from the doubly charged precursor ion at  $m/z = 692.325$ . Most of the unmarked ions could be assigned to loss of water and ammonia from the parent fragment ions as listed in panel D.

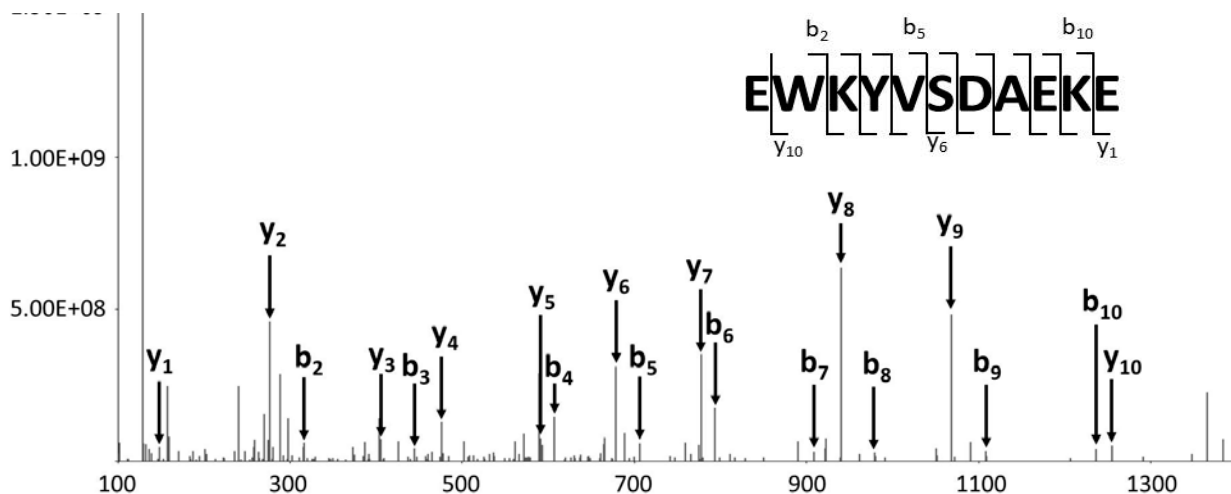

D. Assigned fragmentation ions and mass accuracy from tandem MS of the EWKYVSDAEKE peptide shown in panel C.

| ion                                  | $m/z$ (Theoretical) | $m/z$ (Observed) | ppm  |
|--------------------------------------|---------------------|------------------|------|
| <b>b<sub>3</sub></b>                 | 444.224             | 444.226          | -5   |
| <b>b<sub>4</sub></b>                 | 607.288             | 607.288          | -0.8 |
| <b>b<sub>8</sub></b>                 | 979.452             | 979.454          | -1.5 |
| <b>b<sub>9</sub></b>                 | 1108.495            | 1108.493         | 1.3  |
| <b>b<sub>10</sub></b>                | 1236.59             | 1236.59          | -0.6 |
| <b>b<sub>2</sub>-H<sub>2</sub>O</b>  | 298.119             | 298.119          | -2.3 |
| <b>b<sub>3</sub>-H<sub>2</sub>O</b>  | 426.214             | 426.215          | -2.1 |
| <b>b<sub>4</sub>-H<sub>2</sub>O</b>  | 589.277             | 589.278          | -2.2 |
| <b>b<sub>5</sub>-H<sub>2</sub>O</b>  | 688.345             | 688.346          | -1.2 |
| <b>b<sub>7</sub>-H<sub>2</sub>O</b>  | 890.404             | 890.408          | -4.4 |
| <b>b<sub>8</sub>-H<sub>2</sub>O</b>  | 961.441             | 961.444          | -2.4 |
| <b>b<sub>9</sub>-H<sub>2</sub>O</b>  | 1090.484            | 1090.479         | 4.4  |
| <b>b<sub>6</sub>-NH<sub>3</sub></b>  | 776.361             | 776.363          | -1.7 |
| <b>y<sub>1</sub></b>                 | 148.060             | 148.060          | 0.7  |
| <b>y<sub>2</sub></b>                 | 276.155             | 276.156          | -1.1 |
| <b>y<sub>3</sub></b>                 | 405.198             | 405.198          | -1.2 |
| <b>y<sub>4</sub></b>                 | 476.235             | 476.236          | -2.7 |
| <b>y<sub>5</sub></b>                 | 591.262             | 591.261          | 1.5  |
| <b>y<sub>6</sub></b>                 | 678.294             | 678.294          | -0.1 |
| <b>y<sub>7</sub></b>                 | 777.362             | 777.364          | -1.5 |
| <b>y<sub>8</sub></b>                 | 940.426             | 940.427          | -1.4 |
| <b>y<sub>9</sub></b>                 | 1068.521            | 1068.526         | -5   |
| <b>y<sub>10</sub></b>                | 1254.6              | 1254.598         | 1.7  |
| <b>y<sub>2</sub>-H<sub>2</sub>O</b>  | 258.145             | 258.146          | -3.5 |
| <b>y<sub>3</sub>-H<sub>2</sub>O</b>  | 387.187             | 387.188          | -1.8 |
| <b>y<sub>4</sub>-H<sub>2</sub>O</b>  | 458.225             | 458.227          | -4.6 |
| <b>y<sub>9</sub>-H<sub>2</sub>O</b>  | 1050.51             | 1050.511         | -0.9 |
| <b>y<sub>10</sub>-H<sub>2</sub>O</b> | 1236.59             | 1236.59          | -0.6 |
| <b>y<sub>2</sub>-NH<sub>3</sub></b>  | 259.129             | 259.130          | -2.7 |

## Figure S6

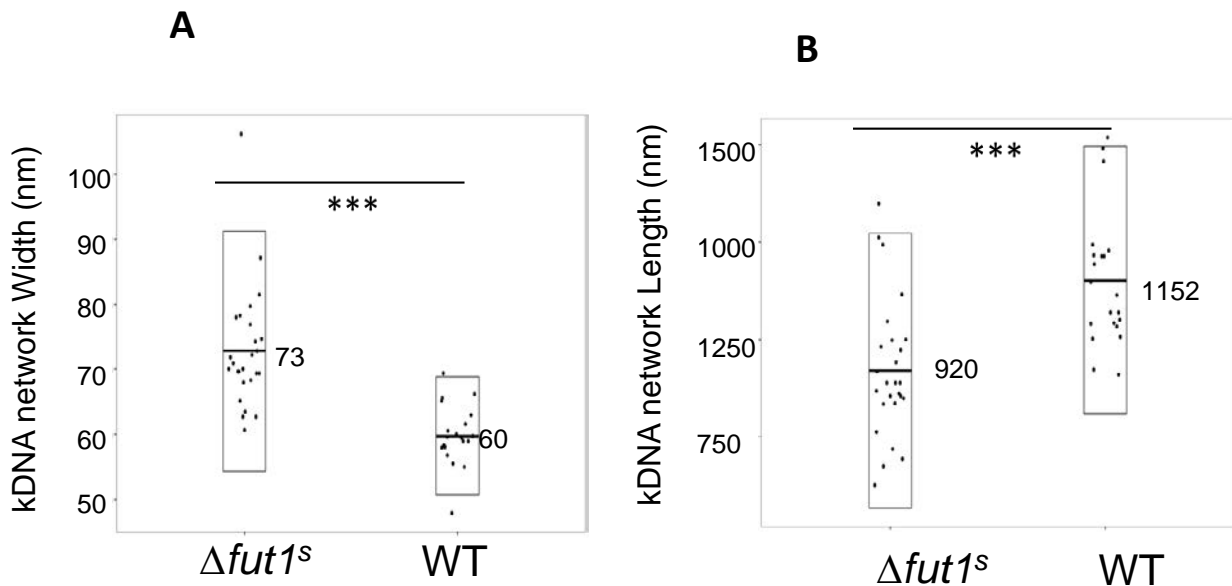

**Figure S6. Measurement of the kDNA network dimensions in WT and  $\Delta fut1^s$ .**

The kDNA network width and length were measured from transmission EM images using Image J; each dot represents one network. A, width; B, length. \*\*\*,  $p$  value < 0.001

**Table S1. Expression and gene targeting constructs used in this study**

| Construct Name                                                             | Lab strain | Description                                                                                                    | Reference or method of construction (for primer sequences see Table S2)                                                                                                                                                                                                    |
|----------------------------------------------------------------------------|------------|----------------------------------------------------------------------------------------------------------------|----------------------------------------------------------------------------------------------------------------------------------------------------------------------------------------------------------------------------------------------------------------------------|
| <b><u>Leishmania or E. coli vectors</u></b>                                |            |                                                                                                                |                                                                                                                                                                                                                                                                            |
| pXNGPHLEO                                                                  | B6432      | <i>Leishmania</i> expression vector, PHLEO <sup>R</sup>                                                        | Guo, H. <i>et al</i> (2017), <i>J. Biol. Chem.</i> 292: 10696–10708.                                                                                                                                                                                                       |
| pXNGSAT                                                                    | B5840      | <i>Leishmania</i> expression vector, SAT <sup>R</sup>                                                          | pXNGPHLEO with SAT ORF replacing PHLEO ORF                                                                                                                                                                                                                                 |
| pIR1NEO                                                                    | B6483      | <i>Leishmania</i> expression vector, NEO <sup>R</sup> (episomal, or integrating follow <i>Swa</i> I digestion) | Robinson K.A., Beverley, S.M. (2003); <i>Mol Biochem Parasitol</i> 128: 217–228                                                                                                                                                                                            |
| pIR1SAT                                                                    | B3541      | <i>Leishmania</i> expression vector, SAT <sup>R</sup> (episomal, or integrating follow <i>Swa</i> I digestion) | Capul AA, <i>et al</i> (2007), <i>J. Biol. Chem.</i> 282: 14006–14017                                                                                                                                                                                                      |
| pGEX-3X                                                                    | B6011      | <i>E. coli</i> expression vector; Amp <sup>R</sup>                                                             | Smith D.B., Johnson K.S (1988), <i>Gene</i> 67:31-40.                                                                                                                                                                                                                      |
| pET-16B                                                                    |            | <i>E. coli</i> expression vector; Amp <sup>R</sup>                                                             | Studier, F.W. (2018), <i>Current Protocols in Molecular Biology</i> (2018) 124:e63                                                                                                                                                                                         |
| pGEM-T                                                                     |            | <i>E. coli</i> TA cloning vector; Amp <sup>R</sup>                                                             | http://www.promega.com                                                                                                                                                                                                                                                     |
| <b><u>constructs for expression in Leishmania</u></b>                      |            |                                                                                                                |                                                                                                                                                                                                                                                                            |
| pGEM-FUT1                                                                  | B6552      | LmjFUT1 ORF donor                                                                                              | PCR with primers 3955/3956 from LmjFV1 genomic DNA, insert by TA cloning into pGEM-T                                                                                                                                                                                       |
| pXNGPHLEO-FUT1                                                             | B7073      | <i>Leishmania</i> expression vector for LmjFUT1                                                                | insertion of BglII -digested ORF from pGEM-FUT1 into BglII site of pXNGPHLEO                                                                                                                                                                                               |
| pIR1NEO-FUT1-HA                                                            | B7147      | <i>Leishmania</i> expression vector for LmjFUT1-HA                                                             | PCR LmjF ORF using primers 3955/5645 adding C-terminal HA tag with LmjFV1 DNA template; insert into BglII site of pIR1NEO                                                                                                                                                  |
| pIR1NEO-TbFUT1                                                             | B7148      | <i>Leishmania</i> expression vector for TbFUT1                                                                 | PCR of TbFUT1 ORF from <i>T.brucei</i> strain 427 genomic DNA with primers 5642/5643, digested with XmaI and inserted into XmaI site of pIR1NEO                                                                                                                            |
| pIR1NEO-TbFUT1-HA                                                          | B7198      | <i>Leishmania</i> expression vector for TbFUT1-HA                                                              | PCR of TbFUT1 from <i>T.brucei</i> strain 427 genomic DNA with primers 5642/6193 adding C-terminal HA tag with <i>T.brucei</i> strain 427 DNA, inserted into pIR1NEO                                                                                                       |
| pIR1NEO-MSK-FUT1-HA                                                        | B7197      | <i>Leishmania</i> expression vector for truncated LmjFUT1 mutant MSK-FUT1-HA                                   | PCR with primers 6192/5645 from LmjFV1 genomic DNA, digested with BglIII, and inserted into BglIII site of pIR1NEO                                                                                                                                                         |
| pIR1NEO-MKA-HA                                                             | B7321      | <i>Leishmania</i> expression vector for truncated LmjFUT1 mutant MKA-FUT1-HA                                   | PCR with primers 6761/5645 from LmjFV1 genomic DNA, digested with BglIII and inserted into BglIII site of pIR1NEO                                                                                                                                                          |
| pIR1NEO-MAR-HA                                                             | B7322      | <i>Leishmania</i> expression vector for truncated LmjFUT1 mutant MAR-FUT1-HA                                   | PCR with primers 6762/5645 from LmjFV1 genomic DNA, digested with BglII and inserted into BglII site of pIR1NEO                                                                                                                                                            |
| pIR1NEO-MTP-HA                                                             | B7299      | <i>Leishmania</i> expression vector for LmjFUT1 mutant MTP-HA with mutated MTP                                 | PCR with primers 6741/5645 from LmjFV1 genomic DNA, digested with BglIII and inserted into BglIII site of pIR1NEO                                                                                                                                                          |
| pIR1NEO-BLOCK-HA                                                           | B7326      | <i>Leishmania</i> expression vector for LmjFUT1 mutant BLOCK-HA with blocked MTP                               | <i>PTR1</i> and <i>FUT1</i> were PCR amplified using primer pairs 2577/6795 and 6794/5645; products were mixed and amplified using primers SMB 2577/5645; large product, digested with BglII, and inserted into BglII site of pIR1NEO                                      |
| pIR1NEO-CAT-HA                                                             | B7329      | <i>Leishmania</i> expression vector for LmjFUT1 catalytic mutant CAT-HA                                        | R298A site directed mutant using primer 5895 with pGEM-FUT1; released by BglII and inserted into BglII site of pIR1NEO                                                                                                                                                     |
| pGEM-FUT2                                                                  | B6553      | LmjFUT2 ORF donor                                                                                              | PCR with primers 3990/3958 from LmjFV1 genomic DNA, insert by TA cloning into pGEM-T                                                                                                                                                                                       |
| pIR1SAT-FUT2                                                               | B6553      | <i>Leishmania</i> expression vector for LmjFUT2                                                                | insertion of BglII-digested ORF from pGEM-FUT2 into BglII site of pIR1SAT                                                                                                                                                                                                  |
| pGEM-SCAL                                                                  | B6476      | LmjSCAL ORF donor                                                                                              | PCR with primers 3840/3841 from LmjFV1 genomic DNA, insert by TA cloning into pGEM-T                                                                                                                                                                                       |
| pXNGSAT-SCAL                                                               | B6554      | <i>Leishmania</i> expression vector for LmjSCAL                                                                | insertion of BglII digested ORF from pGEM-SCAL into BglII site of pXNGSAT                                                                                                                                                                                                  |
| <b><u>knockout constructs</u></b>                                          |            |                                                                                                                |                                                                                                                                                                                                                                                                            |
| pGEM-FUT1-SAT                                                              | B7081      | pGEM-T containing $\Delta$ fut1::SAT targeting fragment                                                        | note: fusion PCR was performed as described by Murta <i>et al</i> 2009 <i>Molec. Micro.</i> 71:1386<br>Fusion PCR product bearing FUT1 5' flanking region (primers 3763/5321), SAT ORF (primers 2630/2631), and 3' flanking region (primers 3765/3766), inserted in pGEM-T |
| pGEM-FUT1-HYG                                                              | B7080      | pGEM-T containing $\Delta$ fut1::HYG targeting fragment                                                        | Fusion PCR product bearing FUT1 5' flanking 900 nt (primers 3763/5321), HYG ORF (primers 2561/2662), and 3' flanking 700 nt (primers 3765/3766)                                                                                                                            |
| pGEM-FUT1-PAC                                                              | B7079      | pGEM-T containing $\Delta$ fut1::PAC targeting fragment                                                        | Fusion PCR product bearing FUT1 5' flanking 900 nt (primers 3763/5321), PAC ORF (primers 2557/2558), and 3' flanking 700 nt (primers 3765/3766)                                                                                                                            |
| pGEM-FUT2-HYG                                                              | B7226      | pGEM-T containing $\Delta$ fut2::HYG targeting fragment                                                        | Fusion PCR product bearing FUT2 5' flanking region with primers 3767/3987, HYG ORF (primers 2561/2562), and 3' flanking region (primers 3769/3770) inserted in pGEM-T; released by BamHI+HindIII                                                                           |
| pGEM-FUT2-PAC                                                              | B6548      | pGEM-T containing $\Delta$ fut2::PAC targeting fragment                                                        | Fusion PCR product bearing FUT2 5' flanking region with primers 3767/3987, PAC ORF (primers 2557/2558), and 3' flanking region (primers 3769/3770), inserted in pGEM-T; released by BamHI+HindIII                                                                          |
| pGEM-SCAL-HYG                                                              | B6438      | pGEM-T containing $\Delta$ scal::HYG targeting fragment                                                        | Fusion PCR product bearing SCAL 5' flanking region with primers 3759/3760, HYG ORF (primers 2561/2562), and 3' flanking region (primers 3761/3769/3762) inserted in pGEM-T; released by BamHI+HindIII digestion                                                            |
| pGEM-SCAL-BSD                                                              | B6475      | pGEM-T containing $\Delta$ scal::BSD targeting fragment                                                        | Fusion PCR product bearing SCAL 5' flanking region with primers 3767/3987, BSD ORF (primers 3763/5321), and 3' flanking region (primers 3769/3770) inserted in pGEM-T; released by BamHI+HindIII                                                                           |
| <b><u>constructs for expression of WT and mutant LmjFUT1 in E.coli</u></b> |            |                                                                                                                |                                                                                                                                                                                                                                                                            |
| pGEX-FUT1                                                                  | B7230      | pGEX derivative containing FUT1; Amp <sup>R</sup>                                                              | FUT1 ORF from pIR1NEO-FUT1-HA was released by BglIII digestion and inserted into BamHI site of pGEX-3X                                                                                                                                                                     |
| pGEX-CAT-MUT                                                               | B7600      | pGEX derivative containing mutant of FUT1 (R297A); Amp <sup>R</sup>                                            | FUT1(R297A) ORF from pIR1NEO-CAT-HA was released by BglIII digestion and inserted into BamHI site of pGEX-3X                                                                                                                                                               |
| pGEX-MTP-MUT                                                               | B7604      | pGEX derivative containing mutant FUT1 (2 Glu replaced first two Arg); Amp <sup>R</sup>                        | FUT1 ORF from pIR1NEO-MTP-MUT-HA was released by BglIII digestion and inserted into BamHI site of pGEX-3X                                                                                                                                                                  |
| pET-BLOCK-MUT                                                              | B7632      | pET16B derivative containing PTR1-FUT1; Amp <sup>R</sup>                                                       | PTR-FUT1 was PCR'd from pIR1NEO-BLOCK-HA with primers 7693/3956, digested with NdeI_BallII and inserted into Nde-BamHI digested pET16b                                                                                                                                     |

**Table S2. Oligonucleotide primers**

Guo *et al* 2021

| Primer number | Sequence (5'-3')                                                 | added restriction sites | Purpose                                                                                             |
|---------------|------------------------------------------------------------------|-------------------------|-----------------------------------------------------------------------------------------------------|
| SMB2555       | <i>GGTAACGGTGC</i> <u>CGGGCTGACG</u> CCACCATGGGCCAAGCCTTTGTCTCA  |                         | forward primer to amplify <i>BSD</i> with linker at 5'                                              |
| SMB2556       | <i>CGAGATCCCACGTAAGGTGC</i> TTAGCCCTCCCACACATAACCAGAG            |                         | reverse primer to amplify <i>BSD</i> with linker at 5'                                              |
| SMB2557       | <i>GGTAACGGTGC</i> <u>CGGGCTGACG</u> CCACCATGACCGAGTACAAGCCC     |                         | forward primer to amplify <i>PAC</i> with linker at 5'                                              |
| SMB2558       | <i>CGAGATCCCACGTAAGGTGC</i> TCAGGCACCGGGCTTGCC                   |                         | reverse primer to amplify <i>PAC</i> with linker at 5'                                              |
| SMB2561       | <i>GGTAACGGTGC</i> <u>CGGGCTGACGCCACC</u> ATGAAAAGCCTGAACTC      |                         | forward primer to amplify <i>HYG</i> with linker at 5'                                              |
| SMB2562       | <i>CGAGATCCCACGTAAGGTGC</i> CTATTCTTTGCCCTCG                     |                         | reverse primer to amplify <i>HYG</i> with linker at 5'                                              |
| SMB2577       | <u>TTAGATCTCC</u> ACCATGACTGCTCCGACCGTGCTG                       | BglII                   | forward primer to amplify ORF of <i>PTR1</i>                                                        |
| SMB2601       | ATCCAATGTTCCGCCACCTGCTC                                          |                         | l-SAT <i>FUT1</i> primer e (Fig. S3)                                                                |
| SMB2609       | TACTCTCGGGCGCATTGACCTGTT                                         |                         | r-SAT primer f (Fig. S3)                                                                            |
| SMB2630       | <i>GGTAACGGTGC</i> <u>CGGGCTGACGCCACC</u> ATGAAGATTTCCGGTGATCC   |                         | forward primer to amplify <i>SAT</i> with linker at 5'                                              |
| SMB2631       | <i>CGAGATCCCACGTAAGGTGC</i> TTAGGCGTCATCCTGTGCTCC                |                         | reverse primer to amplify <i>SAT</i> with linker at 5'                                              |
| SMB2888       | ACGTCGAGTGCCGAAGGAC                                              |                         | r-PAC primer h (Fig. S3)                                                                            |
| SMB2889       | ACCGTGGGCTGTACTCGG                                               |                         | l-PAC primer g (Fig. S3)                                                                            |
| SMB3176       | CAGCAGCCCTCTATATACCCGC                                           |                         | episomal pXNG-FUT forward primer (Fig. S3)                                                          |
| SMB3759       | <u>AAGCTTAGTTCG</u> ACAGCAGCCAAAGC                               | HindIII                 | forward primer to amplify 5' flanking region of <i>SCAL</i> with linker at 5'                       |
| SMB3760       | <i>CGTCAGCCCGCACCGTTACC</i> GATGATGACCAATAATGGC                  |                         | reverse primer to amplify 5' flanking region of <i>SCAL</i> with linker at 5'                       |
| SMB3761       | <i>GCACCTTACGTGGGATCTCG</i> GCTTCGCGACCCAGCCTCGAGCC              |                         | forward primer to amplify 3' flanking region of <i>SCAL</i> with linker at 5'                       |
| SMB3762       | <u>GGATCCG</u> AGGAAAGGTGGAGAGGGAGC                              | BamHI                   | reverse primer to amplify 3' flanking region of <i>SCAL</i> with linker at 5'                       |
| SMB3763       | <u>AAGCTTCGG</u> ACGTGTGGGCTTCTGTTCG                             | HindIII                 | forward primer to amplify 5' flanking region of <i>LmjFUT1</i>                                      |
| SMB3765       | <i>GCACCTTACGTGGGATCTCG</i> TGAGGTGAACCGAGGGAGG                  |                         | forward primer to amplify 3' flanking region of <i>LmjFUT1</i> with linker at 5'                    |
| SMB3766       | <u>GGATCC</u> ATATCAAGGTGACGGGGAGT                               | BamHI                   | reverse primer to amplify 3' flanking region of <i>LmjFUT1</i>                                      |
| SMB3767       | <u>AAGCTTC</u> TCGCTACATTGCCCGTGTA                               | HindIII                 | forward primer to amplify 5' flanking region of <i>LmjFUT2</i>                                      |
| SMB3769       | <i>GCACCTTACGTGGGATCTCG</i> CATCATCGGCCCGAGTACGC                 |                         | forward primer to amplify 3' flanking region of <i>LmjFUT2</i> with linker at 5'                    |
| SMB3770       | <u>GGATCC</u> GGGCGCCGCGGACGAAGAAG                               | BamHI                   | reverse primer to amplify 3' flanking region of <i>LmjFUT2</i>                                      |
| SMB3791       | CACGGGATCCGTCGCTCTGCCGCTCTGTTGGCA                                |                         | RT-PCR to identify correct start codon of <i>LmjFUT2</i>                                            |
| SMB3796       | GCACGCCGTAATGACCGAGG                                             |                         | episomal pXNG-FUT reverse primer (Fig. S3)                                                          |
| SMB3839       | CCGCGCCGCGCACAGTGACGATAACAAGG                                    |                         | reverse primer for <i>FUT2</i> ORF left side (Fig. S2)                                              |
| SMB3840       | <u>CCCTGATCA</u> CCACCATGCAGGACATCGTTCAACCC                      | BclI                    | forward primer to amplify ORF of <i>LmjSCAL</i>                                                     |
| SMB3841       | <u>CCCTGATCA</u> TACACATGTAACCTTGTACAGCA                         | BclI                    | reverse primer to amplify ORF of <i>LmjSCAL</i>                                                     |
| SMB3955       | <u>CCCAGATCT</u> CCACCATGAGAGCTTCTGCTCGGATGCG                    | BglII                   | forward primer to amplify ORF of <i>LmjFUT1</i>                                                     |
| SMB3956       | <u>CCCAGATCT</u> TACAGATGAGTATCCATCCAGGG                         | BglII                   | reverse primer to amplify ORF of <i>LmjFUT1</i>                                                     |
| SMB3957       | <u>CCCAGATCT</u> CCACCATGATGAAGCGTCTACAGGCG                      | BglII                   | forward primer for <i>FUT2</i> ORF right side (Fig. S2)                                             |
| SMB3958       | <u>CCCAGATCT</u> TTAGGCGCCCCCTGAAGCCCGCG                         | BglII                   | reverse primer for pXNGPHLEO-FUT2 ORF right side (Fig. S2)                                          |
| SMB3987       | <i>CGTCAGCCCGCACCGTTACC</i> GCAGCATCGCTCGTGTGATGATAGC            |                         | reverse primer to amplify 5' flanking region of <i>LmjFUT2</i> with linker sequece at 5'            |
| SMB3988       | GGGTGCTTTTGTGCTGACTCGC                                           |                         | l-SAT <i>FUT1</i> primer a = l-PAC = l-WT (Fig. S3)                                                 |
| SMB3990       | <u>CCCAGATCT</u> CCACCATGCTGGAATAGATACGGC                        | BglII                   | forward primer for pXNGPHLEO-FUT2 ORF left side (Fig. S2)                                           |
| SMB5321       | <i>CGTCAGCCCGCACCGTTACC</i> GGACCCGCGACGGCGGTGAGCAATTGAGC        |                         | reverse primer to amplify 5' flanking region of <i>LmjFUT1</i> with linker sequece at 5'            |
| SMB5511       | ACTGTATAGAGGCGACCCGTTT                                           |                         | r-SAT primer d - r-PAC = r-WT (Fig. S3)                                                             |
| SMB5642       | <u>CCCGGGC</u> ACCATGAGCAACAAGGCATTCTAAAC                        | XmaI                    | forward primer to amplify ORF of <i>TbFUT1</i>                                                      |
| SMB5643       | <u>CCCGGGC</u> TACAGGAGGATCCAGTCTGTTAC                           | XmaI                    | reverse primer to amplify ORF of <i>TbFUT1</i>                                                      |
| SMB5645       | <u>AGATCTTCAAGCGTAATCTGGAACATCGTATGGGTAGATGAGTATCCATCCAGGG</u>   | BglII                   | reverse primer to amplify ORF of <i>LmjFUT1</i> with HA tag                                         |
| SMB5895       | GCCCTGCACGTGGCGCGCGGCGACTA                                       |                         | site-directed -mutagenesis primer for <i>LmjFUT1</i>                                                |
| SMB5922       | <u>AGATCT</u> CCACCATGGGCAACCAGCTTTTCTCTCG                       | BglII                   | forward primer to amplify ORF of <i>LmjFUT1</i> using the third start codon                         |
| SMB5966       | <u>AGATCT</u> CCACCATGCGTGTGCTGCGCTCGCAGCAGGCGAC                 | BglII                   | forward primer to amplify ORF of <i>LmjFUT1</i> using the second start codon                        |
| SMB6192       | <u>AGATCT</u> CCACCATGTCGAAAGCAGCCTCACAAC                        | BglII                   | forward primer to amplify ORF of <i>LmjFUT1</i> from starting from MSK                              |
| SMB6193       | <u>CCCGGGTCAAGCGTAATCTGGAACATCGTATGGGTACAGGAGGATCCAGTCTGTTAC</u> | XmaI                    | reverse primer to amplify ORF of <i>TbFUT1</i> with HA tag                                          |
| SMB6741       | <u>AGATCT</u> CCACCATGgagGCTTCTGCTgagATGCGTGTGCTGCGCTCGCAGCAGCG  | BglII                   | forward primer to amplify ORF of <i>LmjFUT1</i> using two GLU codon (gag) to replace ARG codon(AGA) |
| SMB6761       | <u>AGATCT</u> CCACCATGAAAAGCAGCCTCACAACCTAAC                     | BglII                   | forward primer to amplify ORF of <i>LmjFUT1</i> from starting from MKA                              |
| SMB6762       | <u>AGATCT</u> CCACCATGGCAGCCTCACAACCTAACCTTATG                   | BglII                   | forward primer to amplify ORF of <i>LmjFUT1</i> from starting from MAR                              |
| SMB6794       | ATGAGAGCTTCTGCTCGGATGCGGTG                                       |                         | forward primer to amplify ORF of <i>LmjFUT1</i>                                                     |
| SMB6795       | <i>CACGCATCCGAGCAGAAGCTCTC</i> ATGGCCCGGGTAAGGCTG                |                         | reverse primer to amplify ORF of <i>PTR1</i> with complementary sequence of 6794                    |
| SMB7693       | GGAAATCCATATGACTGCTCCGACCGTGCCG                                  | NdeI                    | forward primer to amplify ORF of <i>PTR1</i>                                                        |
